# Supplementary material for: β(2 → 1)-β(2 → 6) branched graminan-type fructans and β(2 → 1) linear fructans impact mucus-related and endoplasmic reticulum stress-related genes in goblet cells and attenuate inflammatory responses in a fructan dependent fashion
Source: Royal Society of Chemistry journal article supplement (doi:10.1039/d2fo02710k), 2023-01-01
Supplement: d2fo02710k1.pdf [file d2fo02710k1.pdf]

**Supplementary information.**

Table S1. Nucleotide sequence of primers used for qPCR of mucus- and ER stress-related genes in goblet cells.<sup>44, 45, 79</sup>

| Protein                                                   | Gene           | Forward (5'-3')                | Reverse (5'-3')                 |
|-----------------------------------------------------------|----------------|--------------------------------|---------------------------------|
| beta-2-microglobulin                                      | <i>B2M</i>     | GGTTTCATCCATCCGACATT           | ACGGCAGGCATACTCATCTT            |
| Mucin-2                                                   | <i>MUC2</i>    | 5'-AACACAGTCCTGGTGGAAAGG       | 5'-CATTGTCAGGTCCCACACAG         |
| Trefoil factor-3                                          | <i>TFF3</i>    | 5'-CATGTCACCCCAAGGAGTG         | 5'-AGGTGCATTCTGCTTCCTGC         |
| Resistin-like $\beta$                                     | <i>RETNLB</i>  | 5'-<br>CACCCAGGAGCTCAGAGATCTAA | 5'-ACGGCCCCATCCTGTACA           |
| Galactose-3-O-sulfotransferase-2                          | <i>GAL3ST2</i> | 5'-TGGGCGGCTTG CAGAGATA        | 5'-GCTCTAAGTCCGAGTGCAGGA        |
| Carbohydrate (N-acetylglucosamine-6-O) sulfotransferase-5 | <i>CHST5</i>   | 5'-CCCAGTGAGGAACTGGTCTTC       | 5'-ATCTGTGTTCCAGGAAAGCC         |
| Heat shock protein family A (Hsp70) member 5 (BiP)        | <i>HSPA5</i>   | 5'-CCACCAAGATGCTGACATTG        | 5'-AGGGCCTGCACTTCCATAGA         |
| X-box binding protein-1                                   | <i>XBP1</i>    | 5'-<br>GGAGTTAAGACAGCGCTTGGGGA | 5'-<br>TGTCTGGAGGGGTGACA ACTGGG |

Table S2. Cycling protocol for qPCR of mucus- and ER stress-related genes in goblet cells.

| <b>Step</b>           | <b>Time and temperature</b> | <b>Temperature</b> |           |
|-----------------------|-----------------------------|--------------------|-----------|
| Polymerase activation | 10 min                      | 95 °C              |           |
| Denaturalization      | 15 sec                      | 95 °C              |           |
| Primer annealing      | 30 sec                      | 55 °C              | 40 cycles |
| Extension             | 30 sec                      | 72 °C              |           |
